# Supplementary material for: A peptide-binding domain shared with an Antarctic bacterium facilitates Vibrio cholerae human cell binding and intestinal colonization
Source: PubMed Central journal article supplement — Proc Natl Acad Sci U S A. 2023 Sep 20;120(39):e2308238120. doi: 10.1073/pnas.2308238120 (PMC10523503; doi:10.1073/pnas.2308238120), 2023-09-20
Supplement: pnas.2308238120.sapp.pdf [file pnas.2308238120.sapp.pdf]

## Supporting Information for

A peptide-binding domain shared with an Antarctic bacterium facilitates *Vibrio cholerae* human cell binding and intestinal colonization

**Cameron J. Lloyd<sup>1</sup>, Shuaiqi Guo<sup>2</sup>, Brett Kinrade<sup>2</sup>, Hossein Zahiri<sup>2</sup>, Robert Eves<sup>2</sup>, Syed Khalid Ali<sup>1</sup>, Fitnat Yildiz<sup>3</sup>, Ilja K. Voets<sup>4</sup>, Peter L. Davies<sup>2</sup>, and Karl E. Klose<sup>1\*</sup>**

**Karl E. Klose<sup>1\*</sup>**

Email: [Karl.Klose@utsa.edu](mailto:Karl.Klose@utsa.edu)

### This PDF file includes:

Supporting text  
Figures S1 to S6  
Tables S1 to S4  
SI References

## Supporting Information Text

### Plasmid construction:

Plasmid pKEK2100 was created by PCR amplification of the R6K ori and oriT from pCVD442 (1) with primers R6K oriT F and R6K oriT R, and cloning via In Vivo Assembly (IVA) (2) into pKEK2094 PCR amplified with pUC118 ori F and pUC118 ori R.  $\Delta$ PBD,  $\Delta$ RIII\_4,  $\Delta$ IGL,  $\Delta$ SBD,  $\Delta$ UKD, and  $\Delta$ 5D deletion constructs were synthesized as ds DNA with approximately 600 bp flanking the deleted domain coding sequence (IDT), which were as indicated in Fig. S1. The  $\Delta$ 5D construct was PCR amplified with the Universal  $\Delta$  Up and Universal  $\Delta$  Dwn primers listed in Table S1, then digested with *NotI* and *ApaI* and ligated into pKEK229 digested similarly to form pKEK2054. The constructs  $\Delta$ PBD,  $\Delta$ RIII\_4,  $\Delta$ IGL, and  $\Delta$ SBD were PCR amplified with the corresponding primers listed in Table S1 and cloned via IVA (2) into pKEK2100 PCR amplified with primers pUC118 MCS F and pUC118 MCS R. These fragments were then digested with *NotI* and *ApaI* and ligated into pKEK229 digested similarly to form pKEK2119 ( $\Delta$ SBD), pKEK2120 ( $\Delta$ IGL), pKEK2121 ( $\Delta$ PBD), and pKEK2124 ( $\Delta$ RIII\_4). The  $\Delta$ UKD construct was PCR amplified with  $\Delta$ UKD F and  $\Delta$ UKD R, and cloned via IVA (2) into pKEK2200 PCR amplified with primers pUC118 MCS F and pUC118 MCS R to form pKEK2157 ( $\Delta$ UKD).

The deletions in *frhB* and *frhD* were constructed by Splicing by Overlap Extension (3) with the primers listed in Table S1, and the resulting deletion fragments were inserted into pKEK2100 PCR-amplified with primers pUC118 MCS F and pUC118 MCS R by IVA (2), resulting in pKEK2110 and pKEK2114. These plasmids were then digested with *NotI* and *ApaI*, and ligated into pKEK229, resulting in plasmids pKEK2122 ( $\Delta$ *frhB*) and pKEK2123 ( $\Delta$ *frhD*). The deletions in *lapD* and *lapG* in strains FY\_VC\_12120 and Fy\_VC\_11863 were PCR-amplified with the indicated primers and cloned by IVA (2) into pKEK2200 PCR-amplified with primers pUC118 MCS F and pUC118 MCS R to create pKEK2265 and 2266 respectively.

The Mp PBD was synthesized as a 620 bp ds DNA fragment (IDT), then PCR-amplified with primers MpIBP RIII-3 F and MpIBP RIII-3 R. This fragment was inserted via IVA (2) into pKEK2121 PCR-amplified with primers RIII-3VC>MP F and RIII-3VC>MP R, resulting in pKEK2335, which has the Vc PBD replaced with Mp PBD (*frhA*<sup>MpPBD</sup>). pKEK2121 was also PCR-amplified with RIII-3VC>AbR F and RIII-3VC>AbR F, and a KanR fragment PCR-

amplified from SAD034 with primers ABD123 and ABD124 (4); these were assembled by IVA (2) resulting in pKEK2447, which replaces PBD with KanR.

***V. cholerae* strain construction:**

The *V. cholerae* mutants were generated through allelic exchange using the plasmids pKEK229 (5) or pKEK2200 (6) via *sacB* counterselection. The Vc strain expressing FrhA<sup>MpPBD</sup> was created by first introducing *frhA::KanR* onto the Vc chromosome from pKEK2447, resulting in KKV3451. The FrhA<sup>MpPBD</sup> in pKEK2335 was then introduced into the KKV3451 chromosome by replacing KanR, resulting in KKV3540.

**Purification and Labelling of FrhA-PBD:**

FrhA-PBD and its attendant split domain, which correspond to the red and orange domains in Figure 1B, respectively, spanning amino acids 1,155-1,460, were produced together as one recombinant protein. The codon-optimized DNA (GeneArt) for this 35-kDa construct was cloned between the *NdeI* and *XhoI* sites of the pET28a plasmid vector and transfected into *E. coli* BL-21 (DE3). After IPTG-induction of the *E. coli* culture, cells were harvested and lysed by sonication as previously described (7). FrhA-PBD was purified by affinity chromatography on nickel-NTA and size-exclusion chromatography on a HiLoad 16/60 Superdex-75 size-exclusion column (GE Healthcare) with a yield of 5 mg/L of culture.

FrhA-PBD in HEPES buffer (pH 8.5) was incubated in covered tubes for 2 h with fluorescein-5-isothiocyanate (FITC) or tetramethylrhodamine (TRITC) at a 20:1 molar ratio. The mixtures were then passed through a size-exclusion column equilibrated with 20 mM Tris-HCl (pH 9.0), 200 mM NaCl, 5 mM CaCl<sub>2</sub> followed by elution with the same buffer.

atgggaattcatgctttgttgtctttaacaaatctagcagcaaatacagctgctcgtgatt  
M G I H A L L S L T N L A A N Q L L V I  
gataaaaacggaaatatcgcgatcatcaacgcaggagaggcggttcctgaagggtgcgatt  
D K N G N I A I I N A G E A V P E G A I  
atcctcgacccgaatagtaacaatgatgcctgagcaggagccactgcccgtagcaca  
I L D P N S N N L M P E Q E P L P V A Q  
ctgggtgatgctgagggtaacgtccagccgatcaccgacgatatagagcagattttagcc  
L V D A E G N V Q P I T D D I E Q I L A  
gcattagaagaaggcgcagacccgactgcactagatgatctcgccccagcagcagggtggc  
A L E E G A D P T A L D D L A **P A A G G**  
cttcaagggtcatccatcacgggtagcgcctccattgagcgtgatggtgctgaaaccatc  
L Q G S S I T G S A S I E R D G A E T I  
gcgtaacacaatgtgatacatccggcttcgaagccattggcctatcaagaacgcaaagc  
A S T Q F D T S G F E A I G L S R T Q S  
ttgagtttgcgaacctactgcaagctcctacggctccaattaccctattccaccagtt  
L S L L N L L Q A P T A P I T P I P P V  
gatccagaagagcctgcctctcccattgtaattagcagtattacaggcgataacgcagcc  
D P E E P A S P I V I S S I T G D N A A  
gaaggtagcaacaataccttttccgtgagcctatcaggtactactgccgcggaaactaca  
E G S N N T F S V S L S G T T A A E T T  
attgtgctgacactggctggtgacactgacgaccaaaggtgtcgatttcaatggtacgtca  
I V L T L A G D T A T K G V D F N G T S  
gttattgtcgttattaatggtgtgagccagacagtgccagttaatgaagatggcaccttc  
V I V V I N G V S Q T V P V N E D G T F  
caagtaacagtgccgaccaatacaaacagcttttagcgttcaagtctctaccattgatgac  
Q V T V P T N T N S F S V Q V S T I D D  
aatactacgaaggaaatgagaccttcaccctaagtgggtgcgggcacaatagcatagtc  
N I Y E G N E T F T L S G A G T N S I V  
acaggtacagcgaccatcactgatgatggcagcaacggcggcacagacgacagcccagta  
T G T A T I T D D G S N G G T D D S P V  
gtaaattggcatcagcagcccaaccgtatcagaaggggaaagcgcaacgtttgacgttagc  
V N G I S S P T V S E G E S A T F D V S  
ctgagcaacgccagcacaacagcgaccaccgtcactttgacattggcgggtggcagcgcg  
L S N A S T T A T T V T L T L A G G S A  
actgcaggcacagacttcaccagtagcgaagtgaccatcacttatcaagatggcaccaca  
T A G T D F T S S E V T I T Y Q D G T T  
caaaccgtggcgtcaatggcgatggttctttcgaagtggcgatcccagcgggtgacacc  
Q T V A V N G D G S F E V A I P A G D T  
acgttcagtatctcggttcaaaccaccgacgataacgtatatgaaggagcgaaagcttc  
T F S I S V Q T T D D N V Y E G S E S F  
aactgagcggaaagaccgacgactcaaggacggcgattaccacgaccggaaccatcgtc  
T L S G K T A T Q G T A I T T T G T I V  
gacaacgacgaggtaccgaccatcaagtcgatcggcaccggcgatgtgaccgacccgaa  
D N D E V P T I K S I G T G D V T A T E  
ggcgacgcgctgatcttcacgggtgaaactgagcaatgtcagcagcaccagcagctccttc  
G D A L I F T V K L S N V S S T S T S F  
gacttctgctgcaagatggcaccgccacgtccgacgactacgggtgcgccagcttcagc

D F L L Q D G T A T S D D Y G A A S F S  
aacggtgtgacctacgacgccagcaccggaagatcacctgcccactggcggtgaccagc  
N G V T Y D A S T G K I T V P T G V T S  
ttcacctcaacgtacctactaccaacgacagcatcgaggaagccgacgaaaccgtcaag  
F T V N V P T T N D S I E E A D E T V K  
ctgaccatcggtggcaaagaggcgatcggcaccatcgtcgcataacgacaacgcgcccgtc  
L T I G G K E A I G T I V D N D N A P V  
atcgacgacgcgaccgtgaataacttgtcagagagcatcgcgaacggcaccgaagtgtac  
I D D A T V N N L S E S I A N G T E V Y  
gacgtacatgaagcgcgcaccggcaacgacaccgacctcgatggtgaagcactgcaatac  
D V H E A R T G N D T D L D G E A L Q Y  
accttcgtgcacagcaacaacaccgtagcactactagtgaagacgggtgcttcagcatc  
T F V H S N N T R S T T S E D G A F S I  
gatccaggcaccggtgaagatcacctgctggataaccaggaagttggattacgagagtgcc  
D P G T G K I T V L D T T K L D Y E S A  
acgtcaatcgtcctgaaagtcgaaacgactgacggcggtgaacaaagacactgcagacatc  
T S I V L K V E T T D G V N K D T A D I  
aactcaacctgactaacgtcaacgacagtgacacggctcttcaccaaagagagtgagacg  
T L N L T N V N D S D T V F T K E S E T  
ttcaactatgcggaaggcacggcggggtgtaacgctgggcaaagtcacagcgaccgac  
F N Y A E G T A A G V T L G K V T A T D  
gccgatggcgacagcatcagttacagcatcgcgcaagagcacaacgtgtacgcgggcgat  
A D G D S I S Y S I A Q E H N V Y A A D  
gatgtgaataaagagcgtccgttctaccaggtggatgccaacggcaatgtgagtctgacc  
D V N K E R P F Y Q V D A N G N V S L T  
gaggcgggtgagaaagcgttcaccaacgactacgagctctggccgaaacacgcacaccatc  
E A G E K A F T N D Y E S G R N T H T I  
acggtgacggcgacgggcacagacgggttcggggcgcgacaccacagacaccatcgaggtg  
T V T A T G T D G S G A D T T D T I E V  
acgctgaacgaaaccaacatcgatgacaacgcaccgaagtttgaaggcaccaccgacggt  
T L N E T N I D D N A P K F E G T T D G  
gagtacagcttcagctacgacgaaaacagcgcgggcgacaccgtactgggcacggtcaag  
E Y S F S Y D E N S A A D T V L G T V K  
gccaccgatgcggataaagagacgggtgacctacagcatcaagtcaggcaacgacaacggc  
A T D A D K E T V T Y S I K S G N D N G  
tggtttgcgattgatgcgaccacgggctgatcacctgactgcgaaaggtgcagaggcg  
W F A I D A T T G V I T L T A K G A E A  
gcggcgaacgactttgaggcgctggccaacgtgcacagcttggtggtgactgcgaccgaa  
A A N D F E A L A N V H S L V V T A T E  
gacgcaggtctgggtggcgtgaagaccaccgacatcacagtcaagctcaacgagcagaac  
D A G L G G V K T T D I T V K L N E Q N  
ctcgatgacaacgcaccgaagtttgaaggcaccaccgacgggtgagtacagcttcagctac  
L D D **N A P K F E G T T D G E Y S F S Y**  
gacgaaaacagcgcgggcgacaccgtactgggcacggtcaaggccaccgatgcggataaa  
**D E N S A A D T V L G T V K A T D A D K**  
gagacgggtgacctacagcatcaagtcaggcaacgacaacggctggtttgcgattgatgcg  
**E T V T Y S I K S G N D N G W F A I D A**

accacgggcggtgatcacccctgactgcgaaagggtgcagagggcggcggcgaacgactttgag  
T T G V I T L T A K G A E A A A N D F E  
gcgctggccaacgtgcacagcttgggtggtgactgcgaccgaagacgcaggtctggggggc  
A L A N V H S L V V T A T E D A G L G G  
gtgaagaccaccgacatcacagtcaagctcaacgagcagaacattgatgaagagcttagt  
V K T T D I T V K L N E Q N I D E E L S  
atrtcagggttgaatggagctaatgctgagttaactatccatgaatccttccaggt  
I S G L N G A N A E L T I H E S N L S G  
ggttcgtcgccagatcactctgctcttagcaaagttgggagtttcagttttacttctatt  
G S S P D H S A L S K V G S F S F T S I  
gacggcttagcgtctttagtaatcgcgggctcatagttttaatgtggcagaacttcttgcg  
D G L A S L V I A G H S F N V A E L L A  
ttgaattcatctgaagcaacaatttcaacgccttatggtgaactcaccttgacgggggtc  
L N S S E A T I S T P Y G E L T L T G F  
agtggtgatctcactggtggaacagttcaatacgaatatacgttgaacgaaaatgtggat  
S G D L T G G T V Q Y E Y T L N E N V D  
aacgattcagccaccaatgcaaagacacggactataccgatcataatctctgtgactgtg  
N D S A T N A N D T D Y T D H I S V T V  
attgatgtggatggcagccagatcacagatagcttagacgttaaaattggtgatgatgct  
I D V D G S Q I T D S L D V K I V D D A  
tctacggctcttgatgaccgtggtgaagtggacattggtggtgacagtttcacgggtctct  
S T A L D D R G E V D I V V D S F T V S  
gggtgtggttgctaactggacatcatggagtaatggtaccaacgtaaccacggttgatgga  
G V V A N W T S W S N G T N V T T F D G  
actaatgcaccaaattggtggtggttagataatgacagtggaagaccaaattccggtgg  
T N A P N G G G L D N D S G K D Q I R W  
ggccaaccgctagctcatacagctctggctacggatttatcgataatgatagtgcgcta  
G Q P A S S Y S S G Y G F I D N D S A L  
aacggtgagtttgcccttaaaccaagatattatggtggtactttactcattacaattat  
N G E F A L N Q D I I L G T F T H Y N Y  
cccgtttattcaggtggtgcgattaccagtgccagtatggatggtgcgttctcagtgaca  
P V Y S G G A I T S A S M D V A F S V T  
gatgccacggcgtacttacacctgtaacggtgaaactgaattttgatcacaatgaaacg  
D A H G V L T P V T L K L N F D H N E T  
ccaaataccaataatccagaagcctcaaaagacatcattaaagttggtaataccaatgtg  
P N T N N P E A S K D I I K V G N T N V  
acttttgagaatgcaggggctctctataccttgcaagtgattggcttttaggattcctggc  
T F E N A G A L Y T L Q V I G F R I P G  
accaatcaaattgtgacggaaattagaacgggtgaaaacgcaactaacagctatgaattg  
T N Q I V T E I R T G E N A T N S Y E L  
ggtgtacgtggttgacctggtgaggggtatgaattgccatccacatcaggcaacgtatta  
V V R V G P G E G Y E L P S T S G N V L  
tccaatgatgtttctggggcagatgtcgatatgacggttgctcgagcagcctctggtaat  
S N D V S G A D V D M T V V G A A S G N  
cacgtgagttccggtgtctcaggcagcgttgatctatgattgcgggctgtatggcaat  
H V S S G V S G S V G S M I A G L Y G N  
ttgatcctgctcgctgatggttagctacacataccaagtgacagcgaatgcatcttcgatt

L I L L A D G S Y T Y Q V T A N A S S I  
cctaataatgatgcaatcgagattttcacttacacatgaaagatggtgatggatgatacctca  
P N D A I E I F T Y T M K D G D G D T S  
actgcggttactttctatcaatgtgaaccgagttacgatggcggatttcaatgctaaccaa  
T A L L S I N V N R V T M A D F N A N Q  
gatcacaagggttggtttggaagacaccgtgggtggccggtaatgtgtagacaatgatgga  
D H K V G L E D T V V A G N V L D N D G  
agcaaaaatacctcagtgatcatttcacggtaggtaatgatgccacttctcacgtggtg  
S K N T S V D H F T V G N D A T S H V V  
ggtagccctggttagcttagagcaaggtagctgacgcttaattcggatggcagttacaca  
G S P V S L E Q G E L T L N S D G S Y T  
ttaaagccagcagataactggaatgggtgaagttccggttattacctacacaaccacact  
F K P A D N W N G E V P V I T Y T T H T  
ggaaaaacgagcacactcgccatcaccatcaccctggtgatgatgacgaggttactcaa  
G K T S T L A I T I T P V D D A T V T Q  
cctgatcataagtcgattgcagaagataactattgacgagggtaatgtgctggccaacgat  
P D H K S I A E D T I A T G N V L A N D  
tgcgatatagacagcgtctctcagtcaccagcttccatggttgaggagtcgaatgggtgtt  
C D I D S A L S V T S F H V E G V N G V  
tataccgctggtaatacagatgtatcagctggctgaaggtactttagtgcttaaggcaaat  
Y T A G N T M Y Q L A E G T L V L K A N  
ggtgattatacctttgatccaaaagataactggagtggtcactaccagaaattacctat  
G D Y T F D P K D N W S G S L P E I T Y  
accaccaataccggagcaactggaactctgaacattcatggttgaggcgggtggctgatgtg  
T T N T G A T G T L N I H V E A V A D V  
ccgaacctgactatcaatggctatacctctggtgctgcaatcaatttcgaggatgcgaga  
P N L T I N G Y T S V A A I N F E D A R  
ttgaatggcagttgggatggcgtggttgctaatacagattaaaggtctgaacacgattgga  
L N G S W D G V V A N Q I K G L N T I G  
acgtggcataccagcaataatagcggtaaagttgaaatcggttacgaaaatatctatgtc  
T W H T S N N S G K V E I G Y E N I Y V  
tccgggtggttcttcaacaataaagtcaggaattgagttcaataacggtgacaagacg  
S G G S S T N K V M E I E F N N G D K T  
ctgtataccgatattcatgctcaagcgggtcggttttatgagctagattttgatattgca  
L Y T D I H A Q A G R F Y E L D F D I A  
gctcgtgctgggtctgtgaacagttcaggtttaaccattaagcttggtcctctgaatgct  
A R A G S V N S S G L T I K L V P L N A  
tacggtgttccctatccttgccgaggcgatcactctttatgatttcaatccaaccaatgcy  
Y G V P I L A E A I T L Y D F N P T N A  
aaactgggtgagagatcaaaaagttacgctccctattgatcaaaactggggaatatcgctctg  
N W L R D Q K V T L P I D Q T G E Y R L  
ttgtttgaaagcgatgatgctaataagctatggggcgatttttagataatttgcggtttaa  
L F E S D D A N S Y G A I L D N L A F K  
gttggtgataatatgggctaccgaggagatttcattaaactgagtgaaatttccacttca  
V V D N M G Y R G D F I K L S E I S T S  
ctgaatgataccgatacctctgaaaccttgagtccttaattaaaaggaatgccagaaggg  
L N D T D T S E T L S L K L K G M P E G

tcgatcttgaaagacgataaaggatcatgaagttacagtggggttcaaacggtgaggtagat  
 S I L K D D K G H E V T V G S N G E V D  
 attacaggatgggattacagcagcttacaattaaaacgccgaaccatggtaatttcaat  
 I T G W D Y S S L Q I K T P N H G N F N  
 attactggtgaagctacggcgactgaaagcagtaaccaagatagtgcaacgacgagtgcg  
 I T V E A T A T E S S N Q D S A T T S A  
 acaattccggtcacgggtattacatcctaataatgagatatttgggacgtggcggtggtgactct  
 T I P V T V L H P N E Y L G R G G V D S  
 ttcttggtgaccaaaaagcaatggcgataatgctaacttaaataattgctctcaatgcttat  
 F L L T K S N G D N A N L N I A L N A Y  
 tatgaaggcaccacagcggtcgcacctgtgacgcaacaagtagcagtaacgattgatacg  
 Y E G T T A V A P V T Q Q V A V T I D T  
 gacttgggtgattcattcaggaaatagtaacgattatatacgatttaggtatttagtcgcgcg  
 D L V I H S G N S N D Y I D L G I S R A  
 gataatacgggtttataccggtagctcaattcctaactttaataattccacgccgtcacaa  
 D N T V Y T G S S I P N F N N S T P S Q  
 tctacactggcgatagcgcggtttatgaaaaatgacgtgattactgatcatgatgggtgtg  
 S T L A D S A F M K N D V I T D H D G V  
 ttattacaatcgggtacaaagccaaattcagccgatcactgatacgggtgaatttaggtagt  
 L L Q S V Q S Q I Q P I T **D T V N L G S**  
 ggtaacgatacagtttatggcgagggtggaaaccttgccgcttatggcgagcgggtaat  
**G N D T V Y G G G G N L A A Y G G A G N**  
 gacactctgattggcggtgatggcaacgatgcactcagaggtgggtgcgataatgactat  
**D T L I G G D G N D A L R G G A D N D Y**  
 ctttcaggaggtcgtggtaatgacgttttacgtgggtgattcaggcaatgacgttcttatt  
**L S G G R G N D V L R G D S G N D V L I**  
 ggtgggtcttggccatgatatttttaaccgggtggctcaggagaagatctcttcaaatggggt  
**G G L G H D I L T G G S G E D L F K W V**  
 gatggagatctggatggaagtacagatcgaattactgatttccatttatctgagaaggat  
 D G D L D G S T D R I T D F H L S E K D  
 aagattgatttaagtgatttggttcgataatccatcagagcaagaggtgacggcactattg  
 K I D L S D L F D N P S E Q E V T A L L  
 gatagcattaaatcaacgggtgcagggtgatgatcattcatcgtcattcaaagtagagaaa  
 D S I K S T V Q G D D H S S S F K V E K  
 aatgatggttcttcgggtgacaattcaattagatggcgtgtcgtccggttgaacttattaac  
 N D G S S V T I Q L D G V S S V E L I N  
 aacctagcatctataattcagattaaagaagactag  
 N L A S I I Q I K E D -

**Fig. S1A. Amino acid sequence of FrhA** *V. cholerae* O395 *frhA* gene (VC395\_1738) and predicted amino acid sequence. The LapG cleavage site PAAG and the “RTX repeat” (COG2931) are in bold, as well as aa 884-1460, which were used to generate polyclonal  $\alpha$ FrhA. The red highlighted nucleotides corresponding to aa 1155-1350 were deleted in  $\Delta$ PBD, the grey highlighted nucleotides corresponding to aa 1351-1460 were deleted in  $\Delta$ RIII\_4, the yellow highlighted nucleotides corresponding to aa 1461-1659 were deleted in  $\Delta$ IGL, the green highlighted nucleotides corresponding to aa 1677-1853 were deleted in  $\Delta$ SBD, and the blue highlighted nucleotides corresponding to aa 1854-2016 were deleted in  $\Delta$ UKD. The  $\Delta$ 5D mutant has a deletion corresponding to aa 1155-2016.



CLUSTAL O(1.2.4) multiple sequence alignment

```

MPPBD      eefevseiaaswvsythgesvttdgts--dlggvdndsakdqirwgnpaeskqsgygfi      58
VCPBD      DSFTVSGVVANWTSWSNGTNTVTFDGTNAPNGGGLDNDSGKDQIRWGQPASSYSSGYGFI    60
           :.* ** :.*.*.*:::* .*****. : **:****.*****:***.*****

MPPBD      dndsnlegrfdlnqdisvgtfthynypvysggaitsaemsvefsvldhlgvstpvtltvn    118
VCPBD      DNDSALNGEFALNQDIILGTFTHYNYPVYSSGGAITSASMDVAFSVTDAHGVLTPTLKLN    120
           **** *:*.* ***** :*****.*.* *** * ** *****.*

MPPBD      fdhnetpntndvnasrdivtvqnthvtferdgdiytvqivgfvfrevgnpdgevvtsiytne  178
VCPBD      FDHNETPNTNNPEASKDIIKVGNTNVTFENAGALYTLQVIGFRIPGT--NQIVTEIRTGE    178
           *****: :*:*:*. * **:****. * :*:*:*:*** *. .::*:.* *.*

MPPBD      naatsyelvvrvvvegdy 196
VCPBD      NATNSYELVVRVGPGEgy 196
           **:.****** *:*

```

**Fig. S1B. Amino acid alignment of FrhA-PBD and *Mpl*BP-PBD.** These are the exact amino acids replaced in FrhA<sup>MpPBD</sup>. Conserved residues are noted by asterisk, conserved residues in the ligand-binding site highlighted in red.

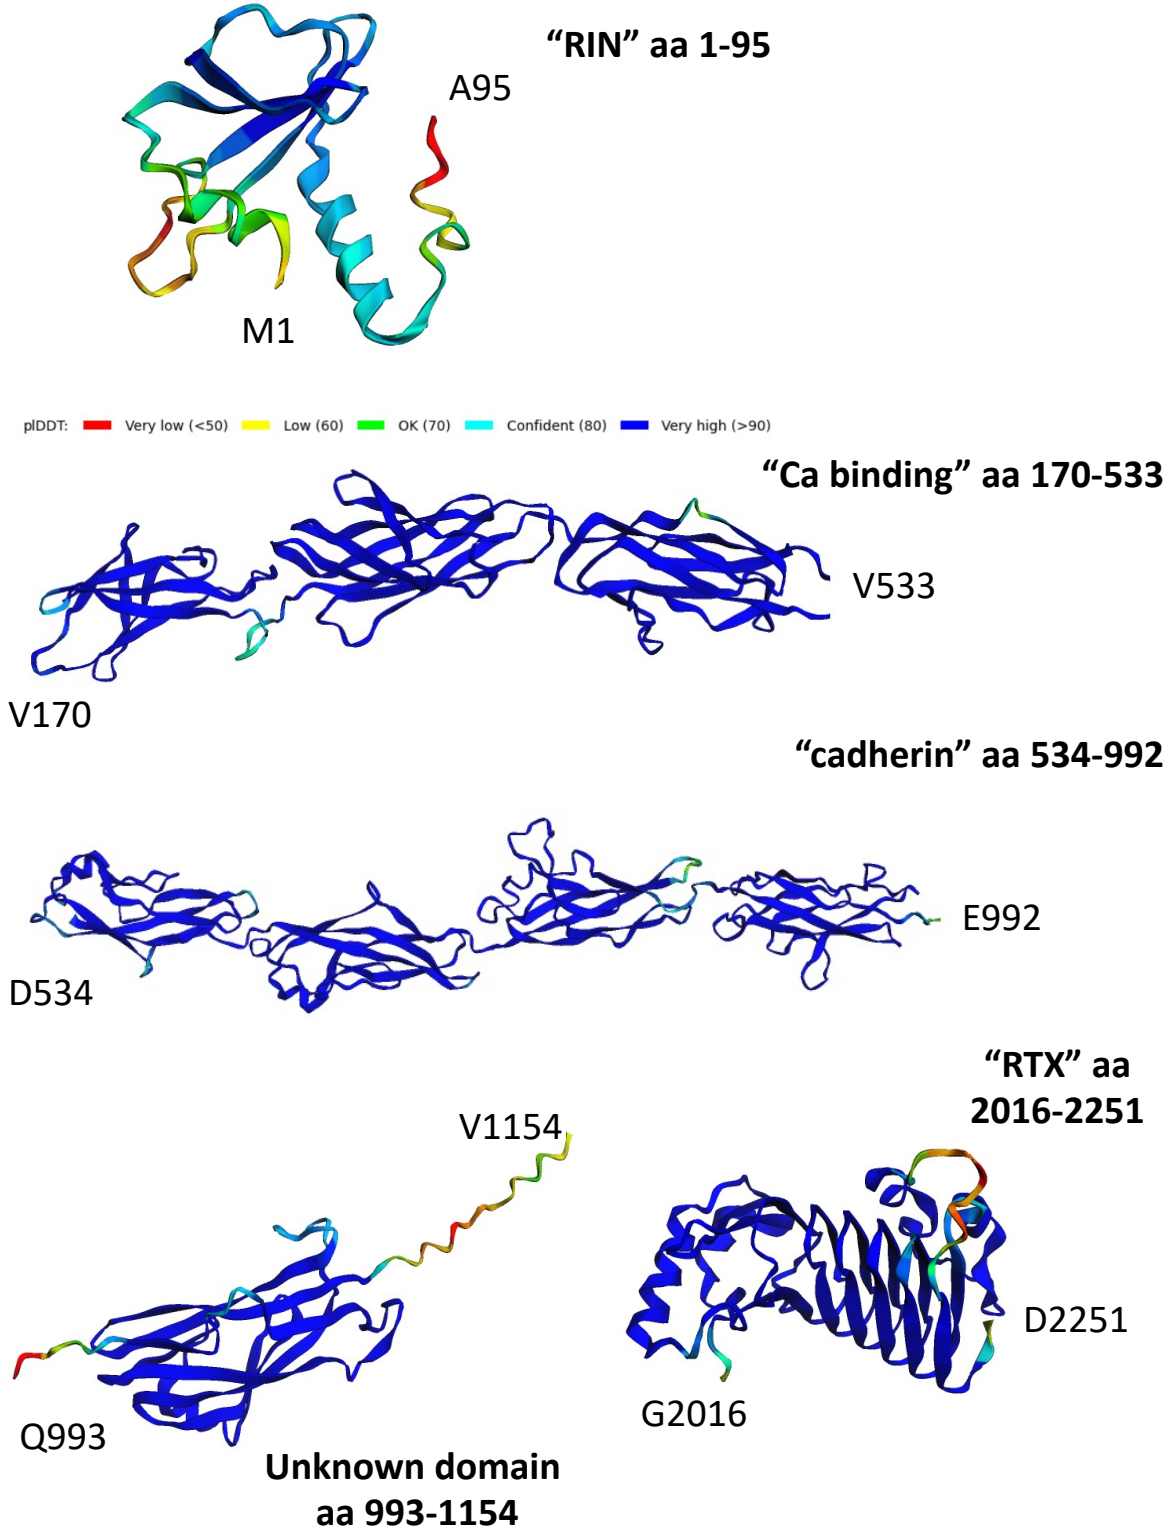

**Fig. S2.A.** AlphaFold predictions of various domains of FrhA

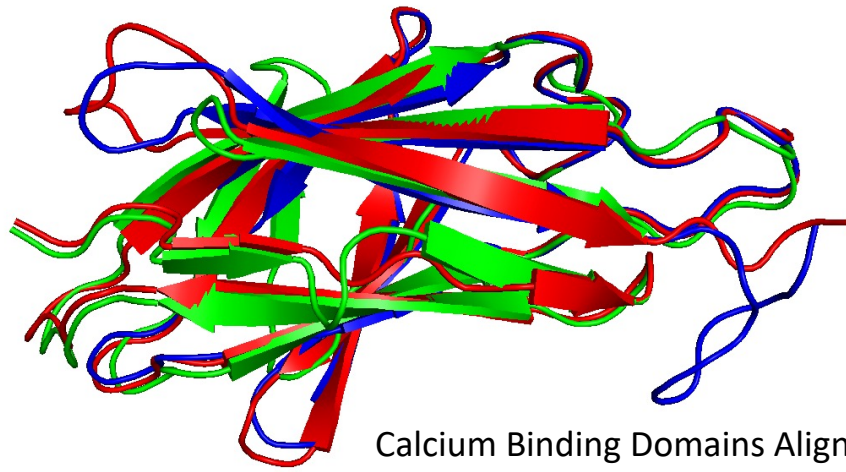

Calcium Binding Domains Alignment  
R->G->B = N -> C Terminal appearance

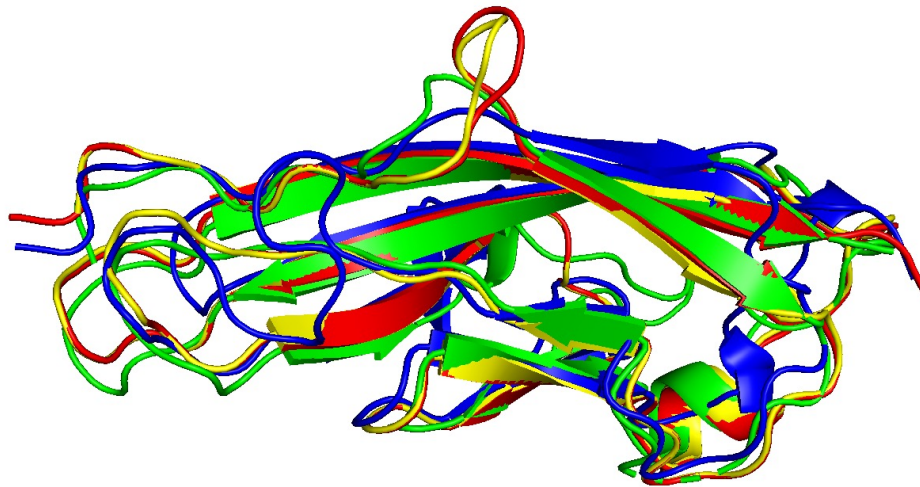

Cadherin Domains Alignment  
Y->R->G->B = N -> C Terminal appearance

**Fig. S2.B.** Structural alignment of predicted calcium binding domains and cadherin domains.

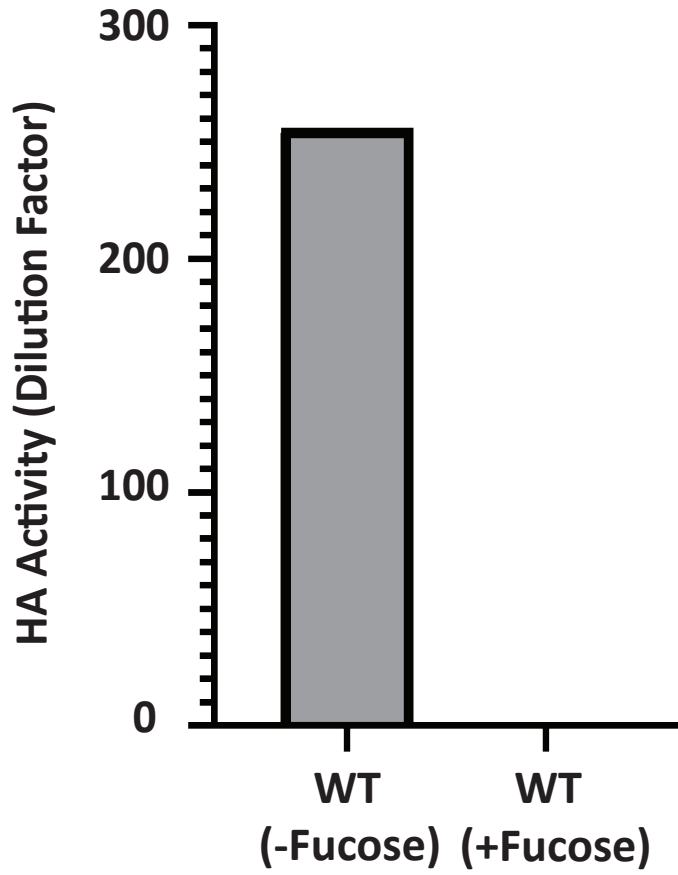

**Fig. S3: Fucose inhibits *V. cholerae* HA activity.** Hemagglutination of human O erythrocytes by *V. cholerae* strain KKV598 (WT) either without or with the addition of 100 mM fucose.

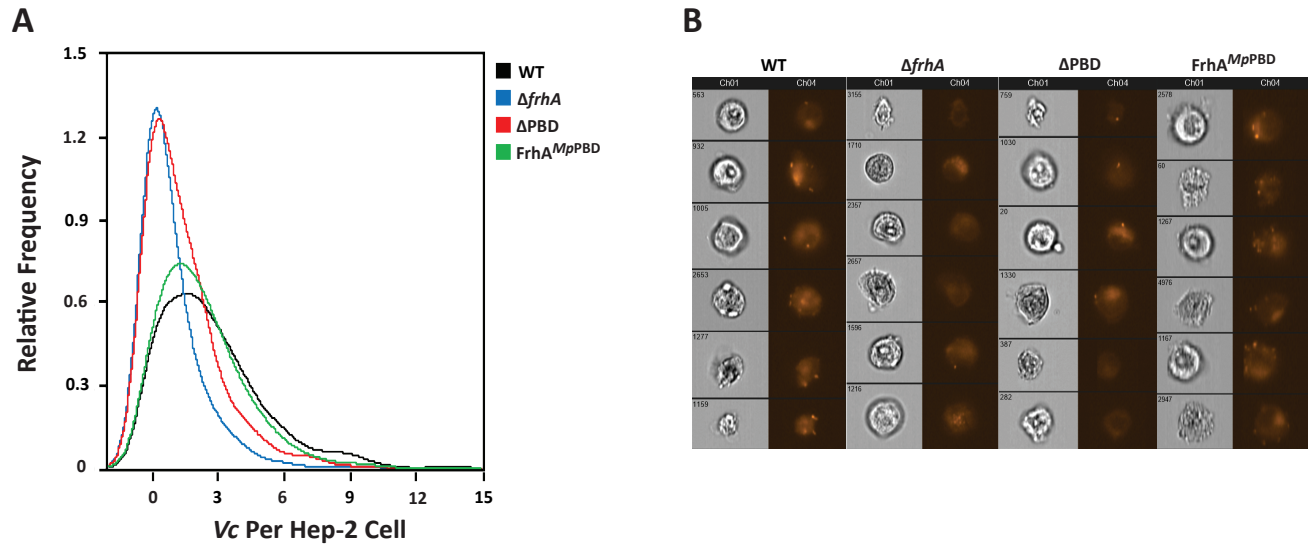

**Fig. S4:** *V. cholerae* binding to Hep-2 cells. **A.** Histogram of *V. cholerae* cells/Hep-2 cell as measured by Image Flow Cytometry; corresponds to Fig. 2A. **B.** Representative Hep-2 cells; corresponds to Fig. 2A and Fig. S4A.

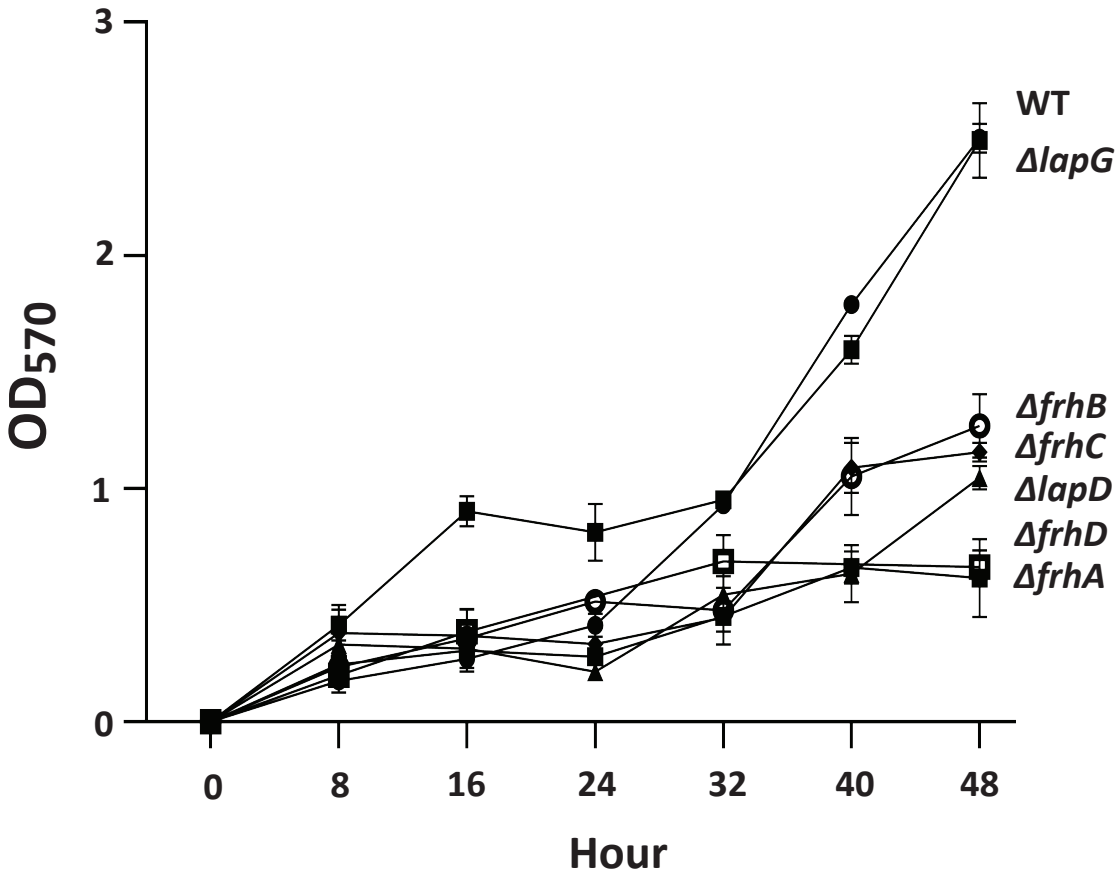

**Fig. S5: Biofilm formation by *V. cholerae* *frhBCD* strains.** *V. cholerae* strains KKV598 (WT), KKV3540 KKV3002 ( $\Delta frhA$ ), KKV3032 ( $\Delta frhB$ ), KKV2075 ( $\Delta frhC$ ), KKV3033 ( $\Delta frhD$ ), KKV2956 ( $\Delta lapD$ ) and KKV2957 ( $\Delta lapG$ ) were monitored for biofilm formation over 48 h, as described in Methods.

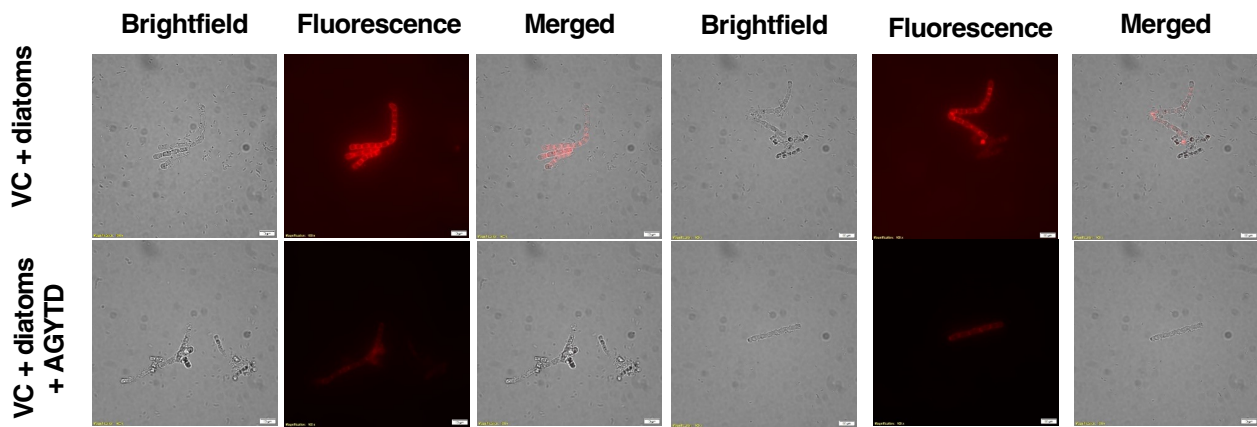

**Fig. S6A: *V. cholerae* binds to diatoms via PBD:** RFP-expressing *V. cholerae* were incubated with the diatom *E. spinifer* for 24 h, either without or with 500 mM AGYTD, and imaged by brightfield and fluorescence microscopy.

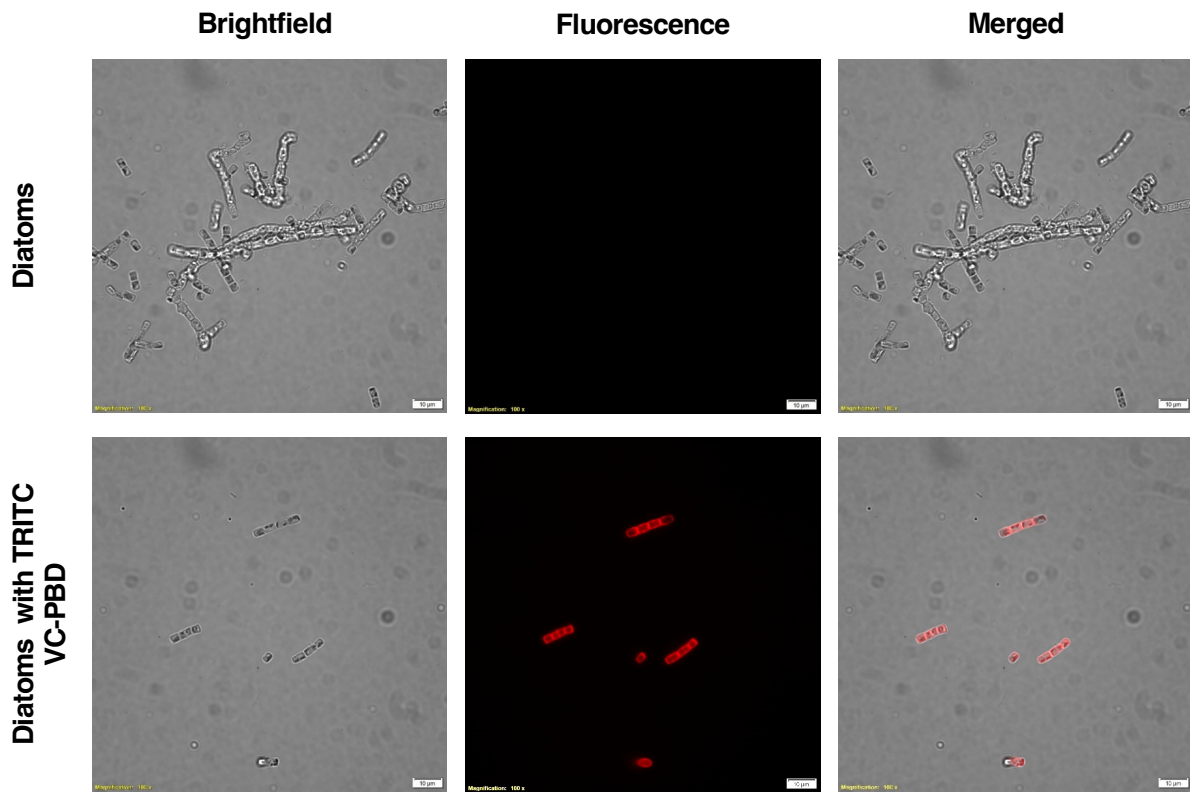

**Fig S6B.** *V. cholerae* PBD binds to diatoms: *E. spinifer* were incubated with TRITC-FrhA-PBD for 24 h and imaged by brightfield and fluorescence microscopy.



**Table S1: *V. cholerae* binding to Hep-2 cells**

| <b>Population</b>               | <b>Count</b> | <b>Mean<br/>Bacteria<br/>per cell</b> | <b>Std. Dev.</b> | <b>Percent of<br/>Mean (WT)</b> | <b>Significance</b> | <b>Percent of<br/>Mean (Mp)</b> | <b>Significance</b> |
|---------------------------------|--------------|---------------------------------------|------------------|---------------------------------|---------------------|---------------------------------|---------------------|
| WT                              | 491          | 2.668                                 | 2.343            | 1                               | NA                  | 1.1789                          | ***                 |
| $\Delta$ <i>frhA</i>            | 1556         | 0.8573                                | 1.38             | 0.3213                          | *****               | 0.3788                          | -                   |
| $\Delta$ PBD                    | 499          | 1.359                                 | 1.681            | 0.5093                          | *****               | 0.6005                          | -                   |
| WT<br>+AGYTD                    | 918          | 1.291                                 | 1.756            | 0.4838                          | *****               | 0.5704                          | -                   |
| WT<br>+YTAGD                    | 1319         | 2.146                                 | 2.14             | 0.8043                          | **                  | 0.9482                          | -                   |
| FrhA <sup>MpPBD</sup>           | 1881         | 2.263                                 | 1.917            | 0.8482                          | **                  | 1                               | NA                  |
| FrhA <sup>MpPBD</sup><br>+AGYTD | 1915         | 1.193                                 | 1.371            | 0.4471                          | -                   | 0.5271                          | *****               |
| FrhA <sup>MpPBD</sup><br>+YTAGD | 1655         | 2.056                                 | 2.049            | 0.7706                          | -                   | 0.9085                          | **                  |

**Table S2: Oligonucleotides used in this study**

| <b>primer</b>      | <b>sequence</b>                                            |
|--------------------|------------------------------------------------------------|
| Universal Δ<br>Up  | GCGCACTAGTGCGGCCGC                                         |
| Universal Δ<br>Dwn | CGCGTCTAGATCAGGGCCC                                        |
| R6K_oriT R         | AAAAGGCCAGGAACCG TTTTGTCCGGTGTGGGGTTGAAG                   |
| R6K_oriT F         | cactgagcgtcagacc CCATGTCAGCCGTTAAGTGTTC                    |
| pUC118 ori R       | ggtctgacgctcagtggaacg                                      |
| pUC118 ori F       | CGGTTCTGGCCTTTTGCTG                                        |
| ΔPBD F             | CGAGCTCGGTACCCGG ACTGCGAAAGGTGCAGAGGC                      |
| ΔPBD R             | CTTGCATGCCTGCAGG CCGTCGCATCATCAACAGGG                      |
| ΔSBD F             | CGAGCTCGGTACCCGG CCGTGGTGGCCGGTAATGT                       |
| ΔSBD R             | CTTGCATGCCTGCAGG CACACCATCATGATCAGTAATCACGTCAT             |
| ΔRIII_4 F          | CGAGCTCGGTACCCGG CTTGATGACCGTGGTGAAGTGA                    |
| ΔRIII_4 R          | CTTGCATGCCTGCAGG TAGCCATTGATAGTCAGGTTCCGCA                 |
| ΔIGL F             | CGAGCTCGGTACCCGG GGATGTTGCGTTCTCAGTGACAGA                  |
| ΔIGL R             | CTTGCATGCCTGCAGG GGTATCGGTATCATTCAGTGAAGTGGAAA             |
| ΔUKD F             | CGAGCTCGGTACCCGG TACCGGAGCAACTGGA ACTCTGA                  |
| ΔUKD R             | CTTGCATGCCTGCAGG<br><br>AACCATCATTTTTCTCTACTTTGAATGACGATGA |
| ΔlapD FC F         | CGAGCTCGGTACCCGG_TCCCGCATCAGAGCAAGAGC                      |
| ΔlapD FC R         | CTTGCATGCCTGCAGG_TAATCAGCAGTGACGCTATCAACACATC              |
| ΔlapG FC F         | CGAGCTCGGTACCCGG_ACTGAATCGGCGGTCGGC                        |

|                     |                                                        |
|---------------------|--------------------------------------------------------|
| ΔlapG FC R          | CTTGCATGCCTGCAGG_ACGGCAAACATACCAATCACTAAGATGC          |
| frhB FC F           | CGAGCTCGGTACCCGG_ATTGAACGTGTGATTCAACAGCTTGAAAAAG       |
| frhB FC R           | CTTGCATGCCTGCAGG<br>AAACACAAAGAACTCTATAAGCAAGCTCAAGACA |
| frhB SOE F          | ATGTAGTTTGGTGTCTTTAAATAGACGAAC                         |
| frhB SOE R          | TTAAAGACACCAAACACTACATGCCTCTGACC                       |
| frhD FC F           | CGAGCTCGGTACCCGG_TTTTCCGCCACACCTGTGATGT                |
| frhD FC R           | CTTGCATGCCTGCAGG_CTTTACGTTTCGACGCAGGTTTAATTTGT         |
| frhD SOE F          | ACAATTATTGGCGCTGAGGGAATAGCCCGC                         |
| frhD SOE R          | CCCTCAGCGCCAATAATTGTTAAGGATATGCTATCTGCGGCG             |
| RIII-3VC>MP<br>F:   | GAATTGCCATCCACATCAGGC                                  |
| RIII-3VC>MP<br>R:   | AACAACAATGTCCACTTCACCAC                                |
| MpIBP RIII-3<br>F:  | <u>AGTGGACATTGTTGTT</u> gaagagtgtgaagtgtctgagattgc     |
| MpIBP RIII-3<br>R:  | ATGTGGATGGCAATTC ataaccatccccctcaaccac                 |
| RIII-3VC>AbR<br>R:  | <u>GTCGACGGATCCCCGGAAT</u> AACAACAATGTCCACTTCACCAC     |
| RIII-3VC>AbR<br>F:  | <u>GAAGCAGCTCCAGCCTACA</u> GAATTGCCATCCACATCAGGC       |
| 229 dPBD<br>atbtc F | GAAGCAGCTCCAGCCTACAAACAACAATGTCCACTTCA                 |
| 229 dPBD<br>atbtc R | GTCGACGGATCCCCGGAATGAATTGCCATCCACATCAG                 |
| pUC118 MCS F        | CCTGCAGGCATGCAAGCTT                                    |
| pUC118 MCS R        | CCGGGTACCGAGCTCGAATTC                                  |
| ABD123              | ATTCCGGGGATCCGTCGAC                                    |

|        |                     |
|--------|---------------------|
| ABD124 | TGTAGGCTGGAGCTGCTTC |
|--------|---------------------|

**Table S3: Plasmids used in this study**

| <b>Plasmid</b> | <b>Description</b>                                | <b>reference</b> |
|----------------|---------------------------------------------------|------------------|
| pFY_116        | pGP704:: <i>Tn7-gfp</i>                           | (8)              |
| pFY_117        | pGP704:: <i>Tn7-rpf</i>                           | (8)              |
| pFY_118        | pUX-BF13                                          | (8)              |
| pKEK 229       | Sucrose-counterselectable suicide<br>vector: AmpR | (5)              |
| pKEK 2054      | $\Delta$ 5D in pKEK229                            | This<br>study    |
| pKEK2094       | Cloning vector; pUC origin; AmpR                  | (6)              |
| pKEK2100       | pKEK2094 with R6K ori and oriT; AmpR              | This<br>Study    |
| pKEK2106       | $\Delta$ SBD in pKEK2100                          | This<br>Study    |
| pKEK 2107      | $\Delta$ IGL in pKEK2100                          | This<br>study    |
| pKEK 2108      | $\Delta$ PBD in pKEK2100                          | This<br>study    |
| pKEK 2109      | $\Delta$ RIII_4 in pKEK2100                       | This<br>study    |
| pKEK2110       | $\Delta$ <i>frhB</i> in pKEK2100                  | This<br>study    |

|           |                                                             |            |
|-----------|-------------------------------------------------------------|------------|
| pKEK2114  | $\Delta$ <i>frhD</i> in pKEK2100                            | This study |
| pKEK2119  | $\Delta$ SBD in pKEK229                                     | This Study |
| pKEK2120  | $\Delta$ IGL in pKEK229                                     | This Study |
| pKEK2121  | $\Delta$ PBD in pKEK229                                     | This Study |
| pKEK2122  | $\Delta$ <i>frhB</i> in pKEK229                             | This study |
| pKEK2123  | $\Delta$ <i>frhD</i> in pKEK229                             | This study |
| pKEK2124  | $\Delta$ RIII_4 in pKEK229                                  | This Study |
| pKEK2157  | $\Delta$ UKD in pKEK2200                                    | This Study |
| pKEK 2200 | Sucrose-counters selectable suicide vector; Cm <sup>R</sup> | (6)        |
| pKEK 2265 | $\Delta$ <i>lapD</i> in pKEK2200                            | This study |
| pKEK 2266 | $\Delta$ <i>lapG</i> in pKEK2200                            | This study |
| pKEK 2270 | <i>hapR</i> expression vector; Tc <sup>R</sup>              | (9)        |

|           |                                               |               |
|-----------|-----------------------------------------------|---------------|
| pKEK 2285 | pBAD- <i>tfoXqstR</i> expression vector; AmpR | (9)           |
| pKEK 2335 | frhA <sup>MPPBD</sup> in pKEK 229             | This<br>Study |
| pKEK2447  | frhA::KanR in pKEK229                         | This<br>Study |

**Table S4: *V. cholerae* strains used in this study**

| <b>Strain</b> | <b>Description</b>                     | <b>Reference/Source</b> |
|---------------|----------------------------------------|-------------------------|
| O395          | <i>V. cholerae</i> wildtype            | (10)                    |
| FY_Vc_12114   | $\Delta lacZ$ ; $\Delta frhA$          | (11)                    |
| FY_VC_12120   | $\Delta lacZ$ ; $\Delta lapD$          | (6)                     |
| Fy_VC_11863   | $\Delta lacZ$ ; $\Delta lapG$          | (6)                     |
| SAD034        | $\Delta VC1807::KanR$                  | (4)                     |
| KKV598        | $\Delta lacZ$                          | (5)                     |
| KKV2075       | $\Delta lacZ$ ; $\Delta frhC$          | (12)                    |
| KKV2759       | $\Delta lacZ$ ; $frhA^{\Delta 5D}$     | This study              |
| KKV2942       | $\Delta lacZ$ ; $frhA^{\Delta PBBD}$   | this study              |
| KKV2956       | $\Delta lacZ$ , $\Delta lapD$          | this study              |
| KKV2957       | $\Delta lacZ$ , $\Delta lapG$          | this study              |
| KKV2985       | $\Delta lacZ$ ; $frhA^{\Delta SBD}$    | this study              |
| KKV2986       | $\Delta lacZ$ ; $frhA^{\Delta RIII_4}$ | this study              |
| KKV2987       | $\Delta lacZ$ ; $frhA^{\Delta IGL}$    | this study              |
| KKV2988       | $\Delta lacZ$ ; Tn7-rfp                | This study              |
| KKV3009       | $\Delta lacZ$ ; $frhA^{\Delta UKD}$    | this study              |
| KKV3032       | $\Delta lacZ$ , $\Delta frhB$          | this study              |
| KKV3033       | $\Delta lacZ$ , $\Delta frhD$          | this study              |
| KKV3451       | $\Delta lacZ$ , $\Delta frhA::KanR$    | This study              |
| KKV3540       | $\Delta lacZ$ ; $frhA^{MpPBBD}$        | this study              |



## SI References

1. M. S. Donnenberg, J. B. Kaper, Construction of an *eae* deletion mutant of enteropathogenic *Escherichia coli* by using a positive-selection suicide vector. *Infect. Immun.* **59**, 4310-4317 (1991).
2. J. Garcia-Nafria, J. F. Watson, I. H. Greger, IVA cloning: A single-tube universal cloning system exploiting bacterial In Vivo Assembly. *Sci Rep* **6**, 27459 (2016).
3. R. M. Horton, H. D. Hunt, S. N. Ho, J. K. Pullen, L. R. Pease, Engineering hybrid genes without the use of restriction enzymes: gene splicing by overlap extension. *Gene* **77**, 61-68 (1989).
4. A. B. Dalia, E. McDonough, A. Camilli, Multiplex genome editing by natural transformation. *Proc Natl Acad Sci U S A* **111**, 8937-8942 (2014).
5. N. E. Correa, C. M. Lauriano, R. McGee, K. E. Klose, Phosphorylation of the flagellar regulatory protein FlrC is necessary for *Vibrio cholerae* motility and enhanced colonization. *Mol. Microbiol.* **35**, 743-755 (2000).
6. A. Mejia-Santana, C. J. Lloyd, K. E. Klose, New cloning vectors to facilitate quick allelic exchange in gram-negative bacteria. *Biotechniques* **70**, 116-119 (2021).
7. S. Guo *et al.*, Molecular basis for inhibition of adhesin-mediated bacterial-host interactions through a peptide-binding domain. *Cell Rep* **37**, 110002 (2021).
8. J. C. Fong, K. Karplus, G. K. Schoolnik, F. H. Yildiz, Identification and characterization of RbmA, a novel protein required for the development of rugose colony morphology and biofilm structure in *Vibrio cholerae*. *J Bacteriol* **188**, 1049-1059 (2006).
9. C. J. Lloyd, A. Mejia-Santana, T. N. Dalia, A. B. Dalia, K. E. Klose, Natural Transformation in a Classical-Biotype *Vibrio cholerae* Strain. *Appl Environ Microbiol* **87** (2021).
10. J. J. Mekalanos, R. J. Collier, W. R. Romig, Enzymic activity of cholera toxin. II. Relationships to proteolytic processing, disulfide bond reduction, and subunit composition. *J. Biol. Chem.* **254**, 5855-5861 (1979).
11. G. Kitts *et al.*, A Conserved Regulatory Circuit Controls Large Adhesins in *Vibrio cholerae*. *mBio* **10** (2019).
12. K. A. Syed *et al.*, The *Vibrio cholerae* flagellar regulatory hierarchy controls expression of virulence factors. *J Bacteriol* **191**, 6555-6570 (2009).
